# Supplementary material
Source: PubMed Central journal article supplement (PMC8666132)
Supplement: NIHMS1753329-supplement-supinfo.pdf [file NIHMS1753329-supplement-supinfo.pdf]

## **Supplementary Information**

Supplementary Figure 1. Generation and characterization of PKG-HA and PKG T<sub>619</sub>Q-HA lines in PbANKA 507c1.

Supplementary Figure 2. Maximum intensity projections of sporozoite motility patterns.

Supplementary Table 1. Effect of chemical and genetic inhibition of PKG on sporozoite infectivity.

Supplementary Table 2. Effect of CDPK4 inhibition on sporozoite infectivity.

# Supplementary Figure 1

A.

Wild type *pkg* locus  
in ANKA 507c1

Targeting vector

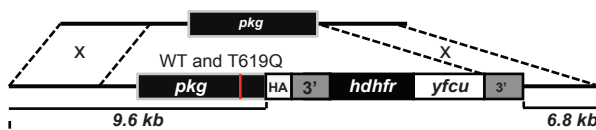

Mutated *pkg* locus  
in ANKA 507c1

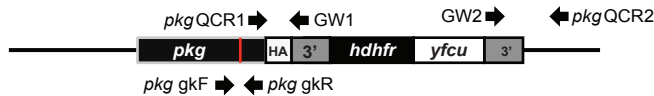

*pkg* QCR1 GCTGGACGTTTGCTTGAACCTCC  
*pkg* QCR2 GGAACCAATGTGTTTTCCATGGGCA  
 GW1 CATACTAGCCATTTTATGTG  
 GW2 CTTTGGTGACAGATACTAC  
*pkg* gkF TTGAAGGACCCATGTTAGCAC  
*pkg* gkR TCAACTGTGCACCCATATCC

B.

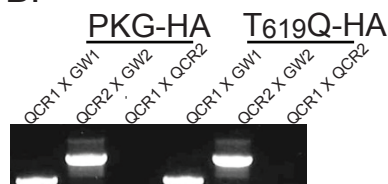

C.

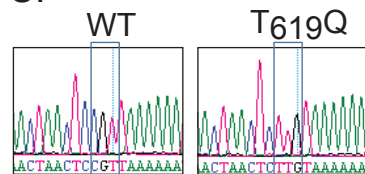

D.

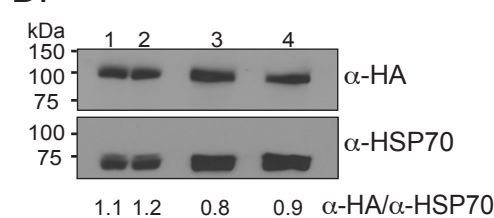

E.

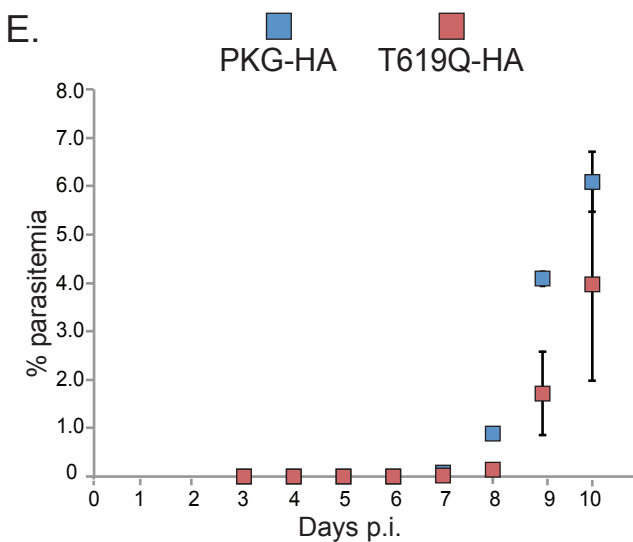

F.

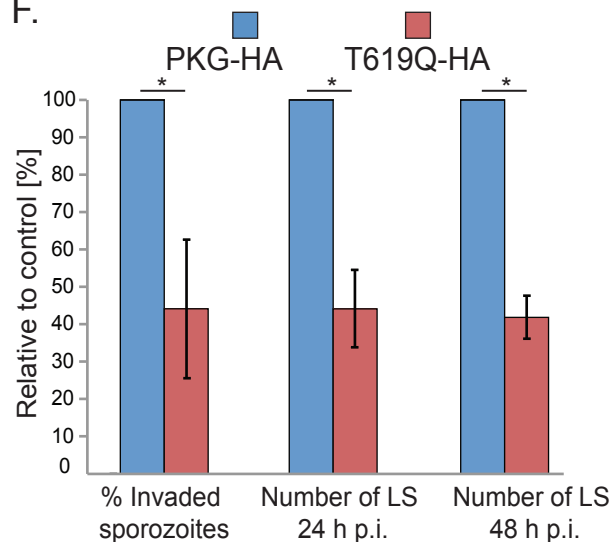

G.

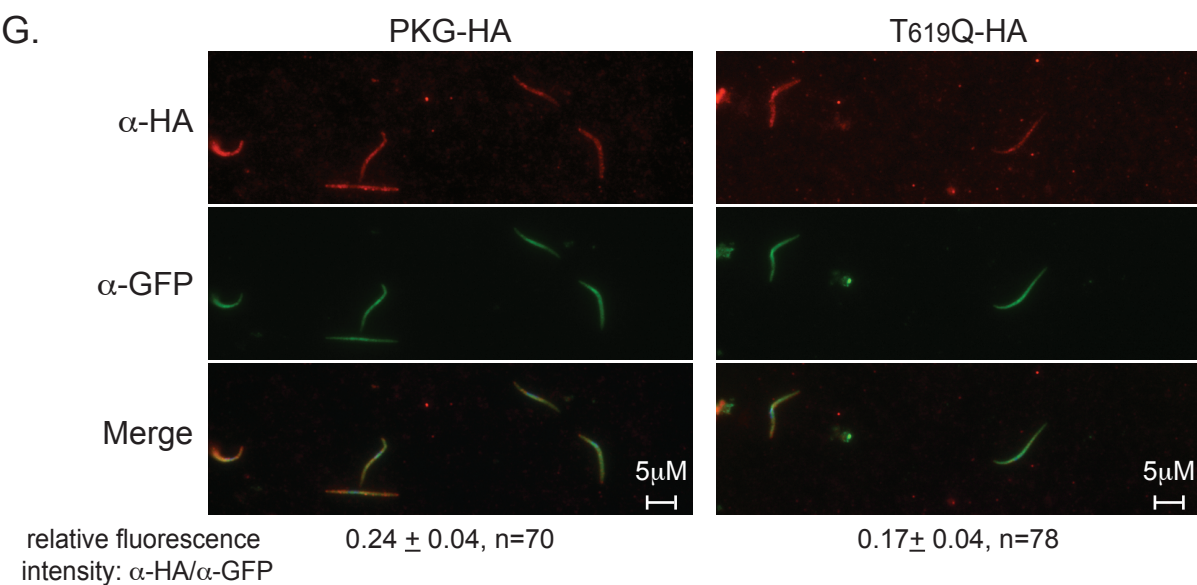

## Supplementary Figure 2

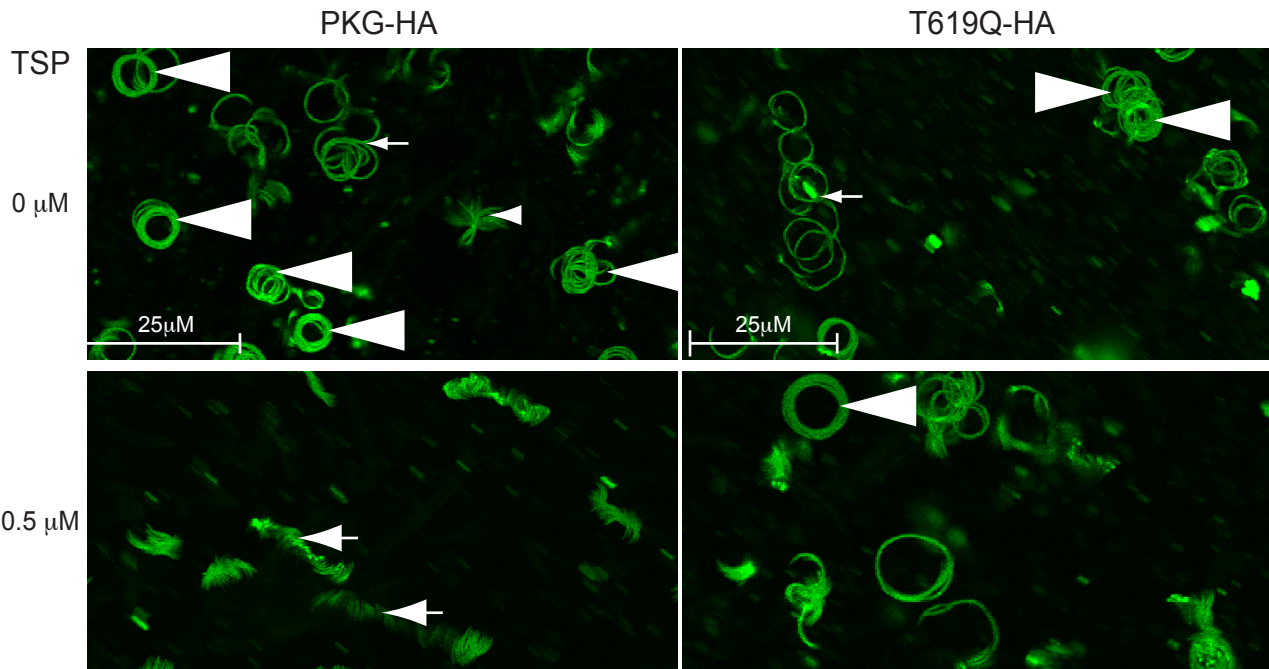

# Supplementary Table 1

| A) Sensitivity to TSP: 0-14h treatment |                              |          | Sensitivity to TSP: pre-treatment of sporozoites |                              |          | Sensitivity to TSP: Invasion |                                   |          | Sensitivity to TSP: 24-65h treatment |                            |             |
|----------------------------------------|------------------------------|----------|--------------------------------------------------|------------------------------|----------|------------------------------|-----------------------------------|----------|--------------------------------------|----------------------------|-------------|
| [TSP]                                  | PKG-HA                       | T619Q-HA | [TSP]                                            | PKG-HA                       | T619Q-HA | [TSP]                        | PKG-HA                            | T619Q-HA | [TSP]                                | PKG-HA                     | T619Q-HA    |
| Experiment 1 (n=4)                     | # of LS, 40h p.i (mean ± SD) |          | Experiment 1 (n=4)                               | # of LS, 40h p.i (mean ± SD) |          | Experiment 1 (n=4)           | % invaded sporozoites (mean ± SD) |          | Experiment 1 (n=3)                   | # of merosomes (mean ± SD) |             |
| 0 μM                                   | 328 ± 21                     | 157 ± 19 | 0 μM                                             | 355 ± 15                     | 117 ± 3  | 0 μM                         | 53 ± 4                            | 22 ± 3   | 0 μM                                 | 10000 ± 589                | 3750 ± 884  |
| 0.1 μM                                 | 292 ± 10                     | 177 ± 9  | 0.5 μM                                           | 114 ± 6                      | 110 ± 11 | 0.5 μM                       | 10 ± 2                            | 27 ± 2   | 0.5 μM                               | 3333 ± 0                   | 3750 ± 884  |
| 0.5 μM                                 | 0 ± 0                        | 199 ± 6  | 2 μM                                             | 18 ± 6                       | 101 ± 6  | 2 μM                         | 3 ± 0                             | 32 ± 1   |                                      |                            |             |
| 2 μM                                   | 0 ± 0                        | 149 ± 16 |                                                  |                              |          |                              |                                   |          |                                      |                            |             |
| 10 μM                                  | 0 ± 0                        | 24 ± 3   |                                                  |                              |          |                              |                                   |          |                                      |                            |             |
| Experiment 2 (n=3)                     |                              |          | Experiment 2 (n=4)                               |                              |          | Experiment 2 (n=3)           |                                   |          | Experiment 2 (n=3)                   |                            |             |
| 0 μM                                   | 224 ± 12                     | 150 ± 6  | 0 μM                                             | 615 ± 47                     | 24.5 ± 1 | 0 μM                         | 40 ± 3                            | 35 ± 2   | 0 μM                                 | 2121 ± 1060                | 2500 ± 353  |
| 0.5 μM                                 | 0 ± 0                        | 143 ± 16 | 2 μM                                             | 25 ± 1                       | 77 ± 0.5 | 0.5 μM                       | 12 ± 2                            | 23 ± 1   | 2 μM                                 | 0 ± 0                      | 1000 ± 0.0  |
| 2 μM                                   | 0 ± 0                        | 89 ± 7   |                                                  |                              |          | 2 μM                         | 5 ± 1                             | 34 ± 2   |                                      |                            |             |
| 10 μM                                  | 0 ± 0                        | 4 ± 0.6  | Experiment 3 (n=4)                               |                              |          |                              |                                   |          | Experiment 3 (n=3)                   |                            |             |
| Experiment 3 (n=4)                     |                              |          | 0 μM                                             | 152 ± 5                      | 75 ± 6   |                              |                                   |          | 0 μM                                 | 9794 ± 676                 | 7783 ± 2291 |
| 0 μM                                   | 328 ± 41                     | 157 ± 38 | 0.5 μM                                           | 68 ± 3                       | 59 ± 2   |                              |                                   |          | 0.5 μM                               | 4167 ± 413                 | 8333 ± 1096 |
| 0.5 μM                                 | 0 ± 0                        | 199 ± 13 | 2 μM                                             | 3 ± 1                        | 79 ± 6   |                              |                                   |          | 2 μM                                 | 567 ± 491                  | 2783 ± 1274 |
| 2 μM                                   | 0 ± 0                        | 149 ± 32 |                                                  |                              |          |                              |                                   |          |                                      |                            |             |
| 10 μM                                  | 0 ± 0                        | 24 ± 6   |                                                  |                              |          |                              |                                   |          |                                      |                            |             |

  

| B) Effect of TSP on motility |                  |                  |                  |                  |                  |                |
|------------------------------|------------------|------------------|------------------|------------------|------------------|----------------|
| Experiment 1                 | Gliding          | Drifting         | Waving           | Adherent         | Complex          | Total observed |
| <b>PKG-HA</b>                |                  |                  |                  |                  |                  |                |
| [TSP]                        | # of sporozoites |                |
| 0 μM                         | 54               | 12               | 29               | 205              | 15               | 315            |
| 0.5 μM                       | 4                | 4                | 53               | 43               | 93               | 197            |
| <b>T619Q-HA</b>              |                  |                  |                  |                  |                  |                |
| 0 μM                         | 13               | 7                | 69               | 257              | 2                | 348            |
| 0.5 μM                       | 15               | 3                | 116              | 157              | 29               | 320            |
| Experiment 2                 |                  |                  |                  |                  |                  |                |
| <b>PKG-HA</b>                |                  |                  |                  |                  |                  |                |
| 0 μM                         | 55               | 3                | 6                | 125              | 64               | 253            |
| 0.5 μM                       | 0                | 11               | 49               | 9                | 181              | 250            |
| <b>T619Q-HA</b>              |                  |                  |                  |                  |                  |                |
| 0 μM                         | 27               | 3                | 18               | 126              | 98               | 272            |
| 0.5 μM                       | 22               | 19               | 55               | 117              | 35               | 248            |

  

| C) % invaded sporozoites (mean ± SD) |         |          | Number of LS, 24h p.i (mean ± SD) |          | Number of LS, 48h p.i (mean ± SD) |                    |          |
|--------------------------------------|---------|----------|-----------------------------------|----------|-----------------------------------|--------------------|----------|
| Experiment                           | PKG-HA  | T619Q-HA | PKG-HA                            | T619Q-HA | PKG-HA                            | T619Q-HA           |          |
| Experiment 1 (n=4)                   | 71 ± 7  | 31 ± 6   | Experiment 1 (n=4)                | 456 ± 14 | 201 ± 21                          | Experiment 1 (n=4) | 792 ± 18 |
| Experiment 2 (n=4)                   | 9 ± 0.6 | 4 ± 0.7  | Experiment 2 (n=4)                | 26 ± 0.7 | 16 ± 3                            | Experiment 2 (n=4) | 411 ± 10 |
| Experiment 2 (n=3)                   | 77 ± 2  | 39 ± 1.8 |                                   |          |                                   | Experiment 3 (n=4) | 157 ± 10 |

## Supplementary Table 2

| A) % invaded sporozoites (mean ± SD) |         |           | Number of LS, 24h p.i (mean ± SD) |           | Number of LS, 48h p.i (mean ± SD) |                    | Number of merosomes, 65-72 h p.i (mean ± SD) |           |                    |             |              |
|--------------------------------------|---------|-----------|-----------------------------------|-----------|-----------------------------------|--------------------|----------------------------------------------|-----------|--------------------|-------------|--------------|
|                                      | Control | CDPK4 cKO | Control                           | CDPK4 cKO | Control                           | CDPK4 cKO          | Control                                      | CDPK4 cKO |                    |             |              |
| Experiment 1 (n=4)                   | 49 ± 7  | 17 ± 1    | Experiment 1 (n=4)                | 84 ± 3    | 39 ± 2                            | Experiment 1 (n=4) | 159 ± 4                                      | 86 ± 4    | Experiment 1 (n=3) | 3278 ± 1171 | 2833 ± 507   |
| Experiment 2 (n=4)                   | 53 ± 3  | 35 ± 2    | Experiment 2 (n=4)                | 823 ± 17  | 459 ± 17                          | Experiment 2 (n=4) | 696 ± 41                                     | 410 ± 10  | Experiment 2 (n=3) | 10227 ± 693 | 12000 ± 2327 |
| Experiment 3 (n=4)                   | 56 ± 9  | 25 ± 0.4  | Experiment 3 (n=4)                | 746 ± 12  | 458 ± 20                          | Experiment 3 (n=4) | 756 ± 23                                     | 418 ± 9   | Experiment 3 (n=4) | 2500 ± 833  | 3000 ± 1000  |
| Experiment 4 (n=4)                   | 41 ± 4  | 19 ± 1    | Experiment 4 (n=4)                | 135 ± 3   | 54 ± 5                            | Experiment 4 (n=4) | 143 ± 14                                     | 47 ± 3    |                    |             |              |

  

| B) <i>In vivo</i> infection |                     | C) Effect of Compound 1294 on sporozoite motility |              |                  |                  |                  |                  |                  |                |
|-----------------------------|---------------------|---------------------------------------------------|--------------|------------------|------------------|------------------|------------------|------------------|----------------|
|                             | Control             | CDPK4 cKO                                         | [1294]       | Gliding          | Drifting         | Waving           | Adherent         | Complex          | Total observed |
| Experiment 1                | n = 5               | n = 4                                             | Experiment 1 | # of sporozoites |                |
| Day 4                       | 3.20E-03 ± 2.21E-03 | 7.25E-04 ± 7.25E-04                               | 0 µM         | 136              | 9                | 14               | 74               | 92               | 325            |
| Day 6                       | 5.84E-01 ± 2.66E-01 | 2.85E-01 ± 7.24E-02                               | 2 µM         | 27               | 3                | 13               | 203              | 117              | 363            |
| Experiment 2                | n = 10              | n = 10                                            | Experiment 2 |                  |                  |                  |                  |                  |                |
| Day 4                       | 1.02E-02 ± 6.09E-03 | 3.00E-04 ± 3.37E-04                               | 0 µM         | 134              | 119              | 13               | 169              | 9                | 444            |
| Day 6                       | 1.10E-01 ± 5.33E-02 | 3.95E-02 ± 1.92E-02                               | 0.5µM        | 106              | 193              | 23               | 216              | 32               | 570            |
|                             |                     |                                                   | Experiment 3 |                  |                  |                  |                  |                  |                |
|                             |                     |                                                   | 0 µM         | 36               | 4                | 13               | 68               | 8                | 129            |
|                             |                     |                                                   | 0.5µM        | 18               | 1                | 27               | 68               | 33               | 147            |
